# Supplementary material
Source: Springer Nature journal article supplement (https://www.springermedizin.de/resource/supplementary/12937_2013_648_MOESM1_ESM.pdf/25653866)

## Men

$$y = 15.342x - 32.668$$

$$R^2 = 0.2344$$

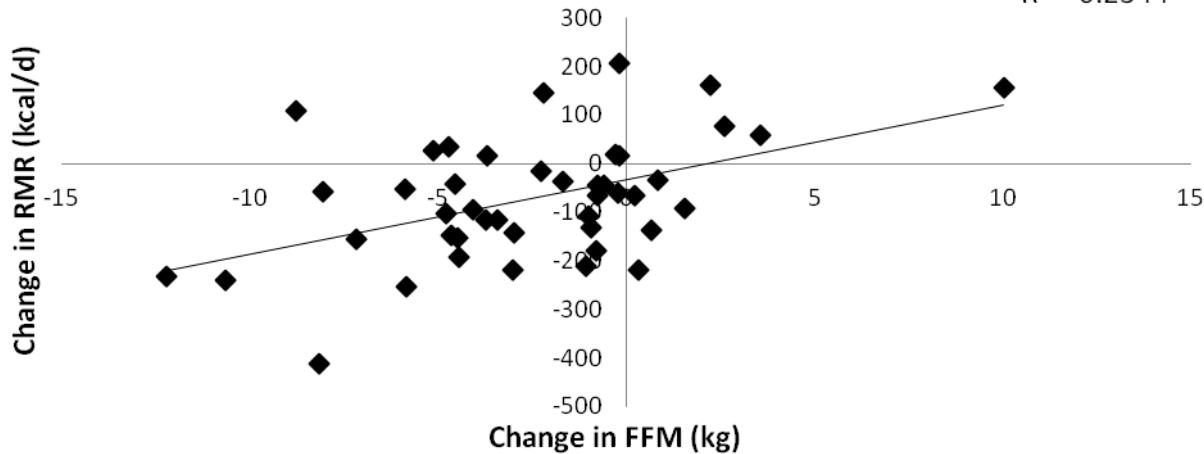

## Women

$$y = -4.2997x - 37.071$$

$$R^2 = 0.0068$$

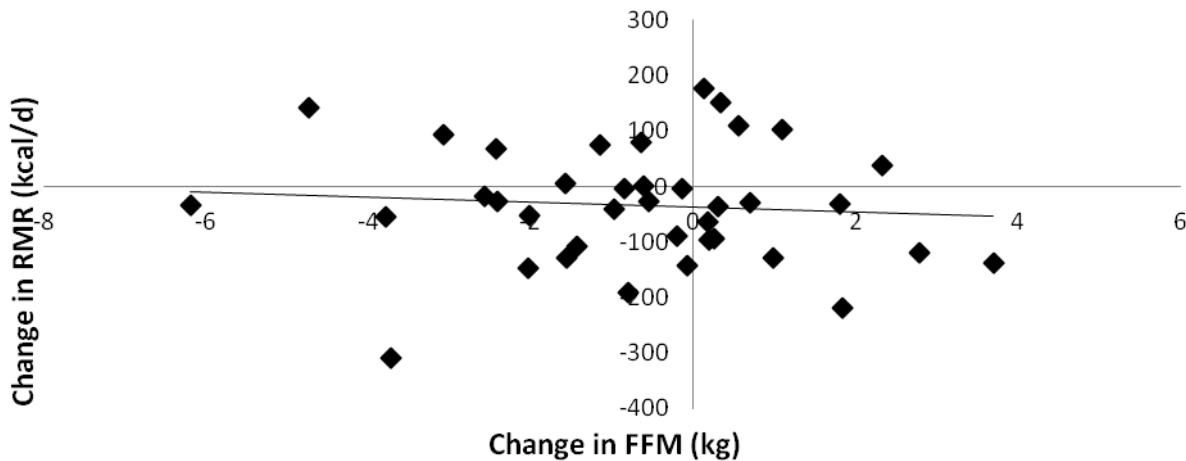

Supplement: MOESM1 [file 25653866]
